# Supplementary material for: Comparative efficacy of vanilloids in inhibiting toll-like receptor-4 (TLR-4)/myeloid differentiation factor (MD-2) homodimerisation
Source: Royal Society of Chemistry journal article supplement (doi:10.1039/c8fo00136g), 2018-01-01
Supplement: c8fo00136g1.pdf [file c8fo00136g1.pdf]

# Supplementary Information

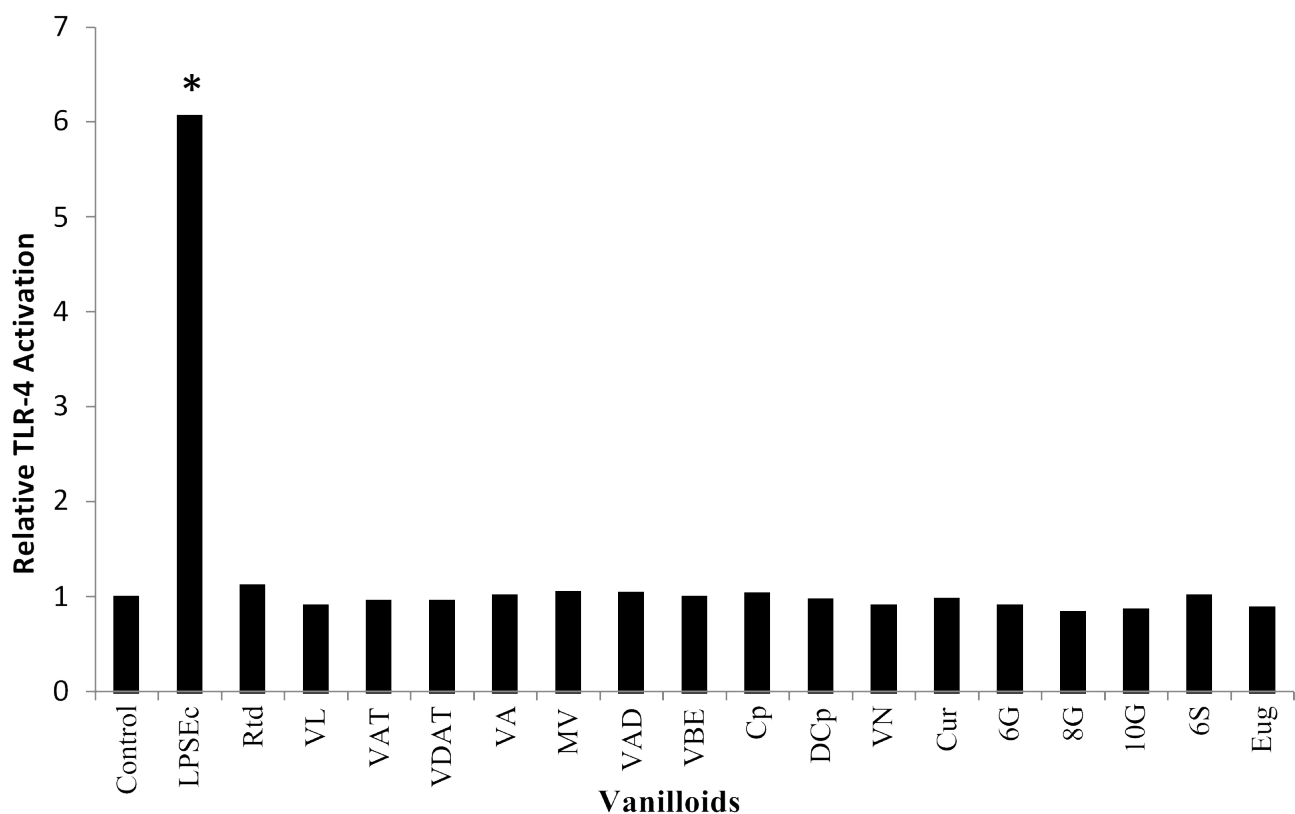

**Figure 1: Vanilloids Do Not Induce TLR-4 Activation.** All test compounds were tested at 100  $\mu$ M except LPS (*Escherichia coli*) (LPSEc) which was 1  $\mu$ g/mL. Results are expressed as mean percentage of TLR-4 activation  $\pm$  SD of three independent experiments. Statistical significant different from the control, HEK-Blue<sup>TM</sup>hTLR4 cells treated with 1% DMSO, are indicated as \* $p$ <0.05 by one-way ANOVA *post hoc* Dunnet's *t*-test.

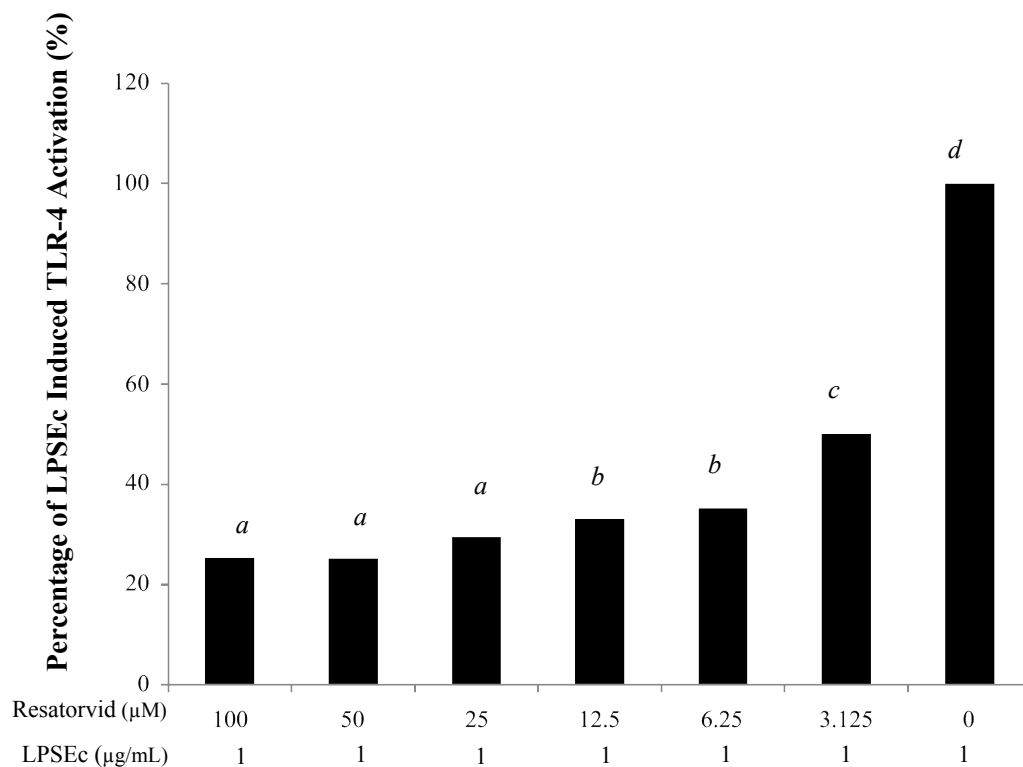

**Figure 2: Resatorvid Inhibits LPSEc Induced TLR-4 Activation.** Resatorvid was added at respective concentrations for 1 hour and followed up by 1 μg/mL (LPSEc) for 24 hours. Results are expressed as percentage of LPSEc induced TLR-4 activation  $\pm$  SD as compared to cells with only LPSEc of at least three independent experiments. Bars with the different descriptors (*a*, *b*, *c*, *d*) are statistically significant ( $p < 0.05$ ) different by one-way ANOVA *post hoc* LSD.

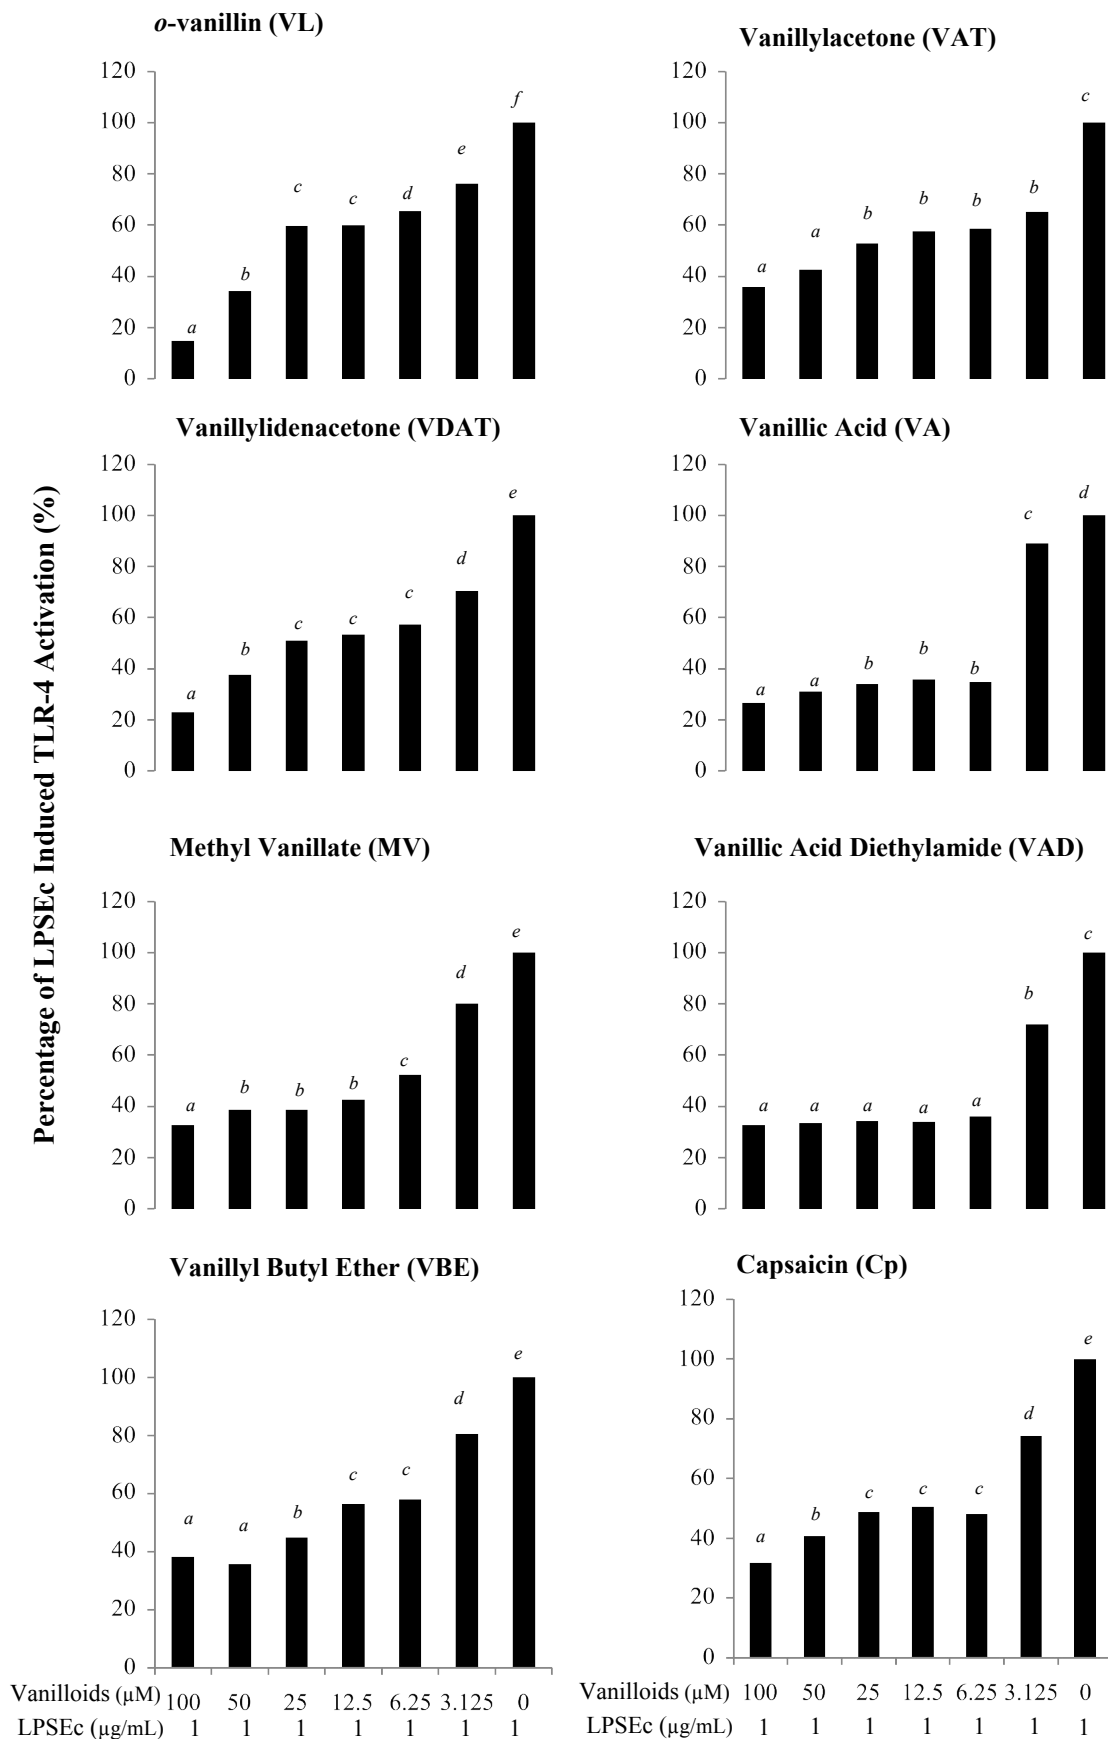

**Figure 3: Vanilloids Inhibit LPSEc Induced TLR-4 Activation.** All vanilloids were added at respective concentrations for 1 hour and followed up by 1 μg/mL (LPSEc) for 24 hours. Results are expressed as percentage of LPSEc induced TLR-4 activation ± SD as compared to cells with only LPSEc of at least three independent experiments. Bars with the different descriptors (*a, b, c, d, e, f, g, h*) are statistically significant ( $p < 0.05$ ) different by one-way ANOVA *post hoc* LSD.

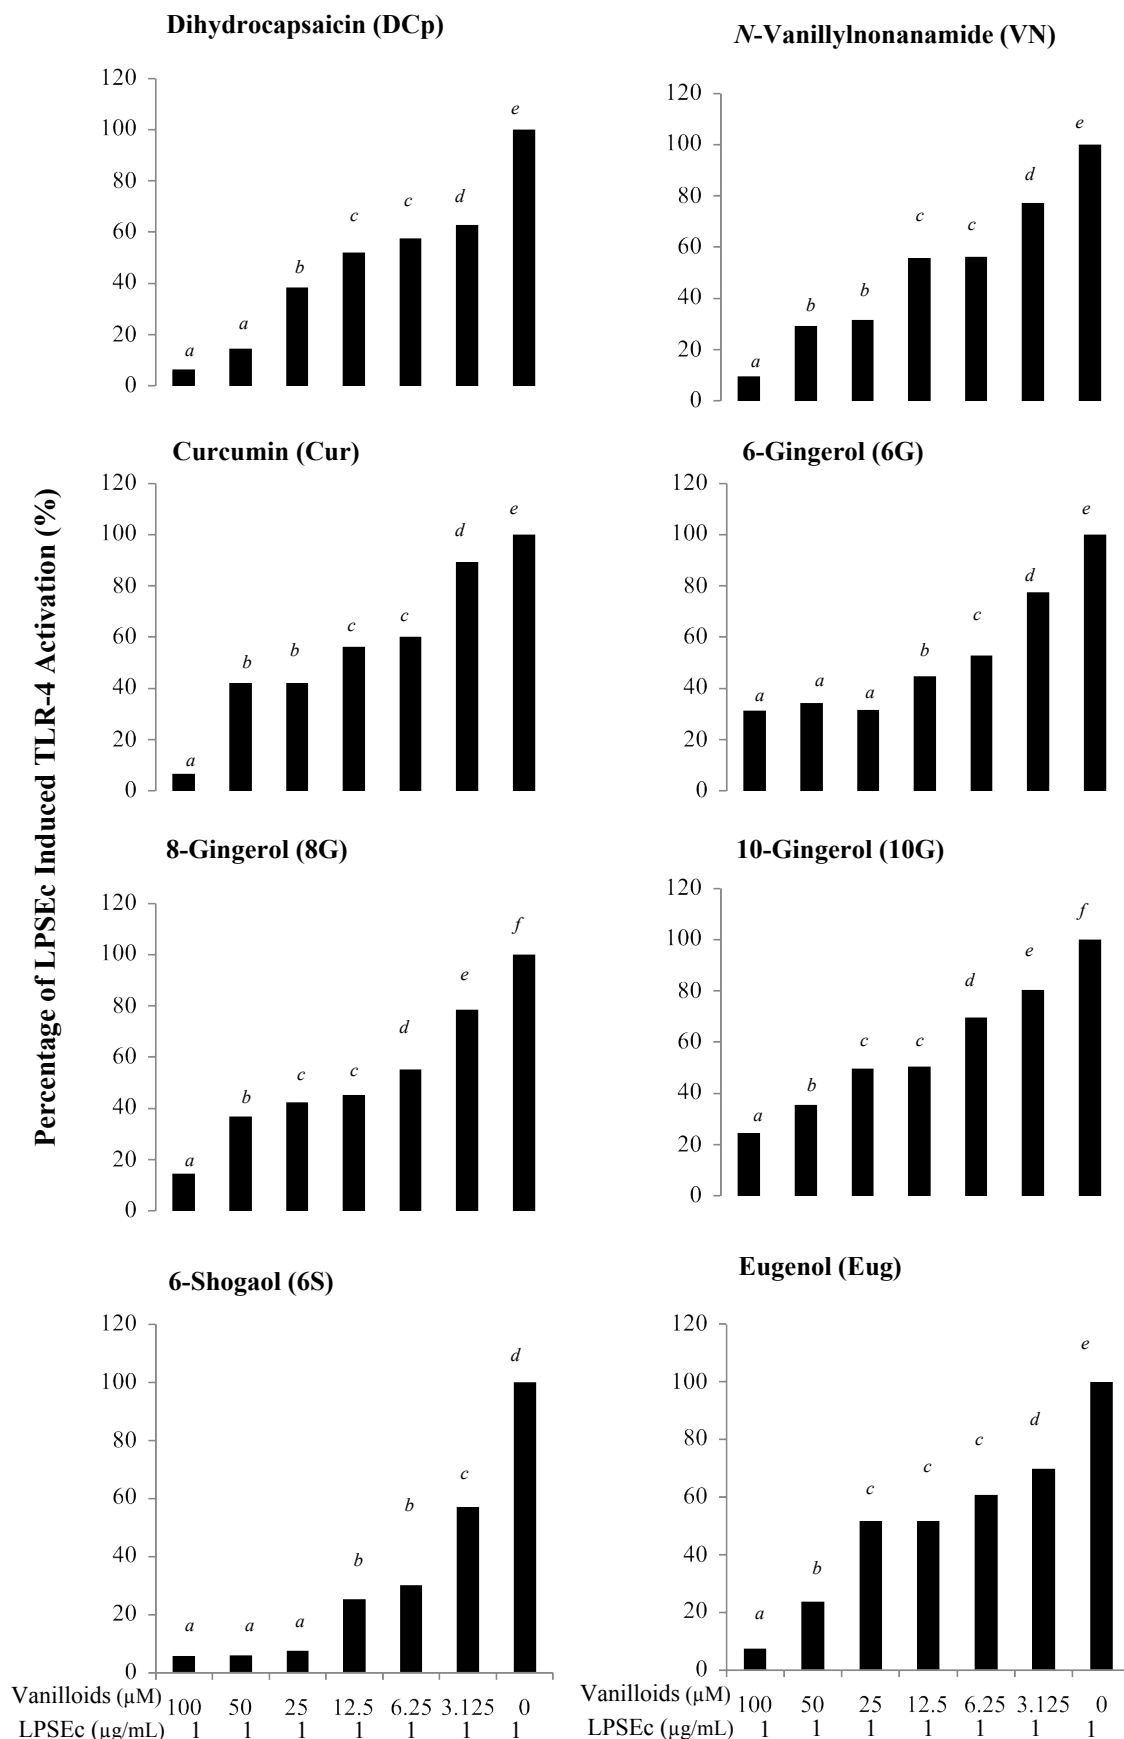

**Figure 3 (continued): Vanilloids Inhibit LPSEc Induced TLR-4 Activation.** All vanilloids were added at respective concentrations for 1 hour and followed up by 1 μg/mL (LPSEc) for 24 hours. Results are expressed as percentage of LPSEc induced TLR-4 activation ± SD as compared to cells with only LPSEc of at least three independent experiments. Bars with the different descriptors (a, b, c, d, e, f, g, h) are statistically significant ( $p < 0.05$ ) different by one-way ANOVA *post hoc* LSD.

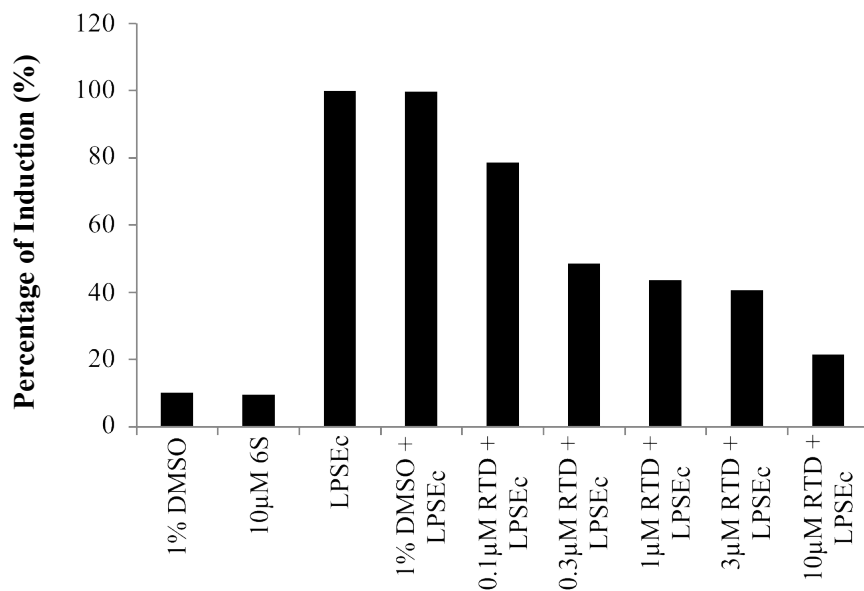

**Figure 4: Resatorvid Inhibits LPSEc Induced Nitric Oxide Production.** Resatorvid was added at respective concentrations for 1 hour and followed up by 1 µg/mL (LPSEc) for 18 hours. Results are expressed as percentage of LPSEc induced nitric oxide production  $\pm$  SD as compared to cells with only LPSEc of at least three independent experiments. Bars with the symbol (\*) are statistically significant ( $p < 0.05$ ) different by one-way ANOVA *post hoc* Dunnett's *t*-test.

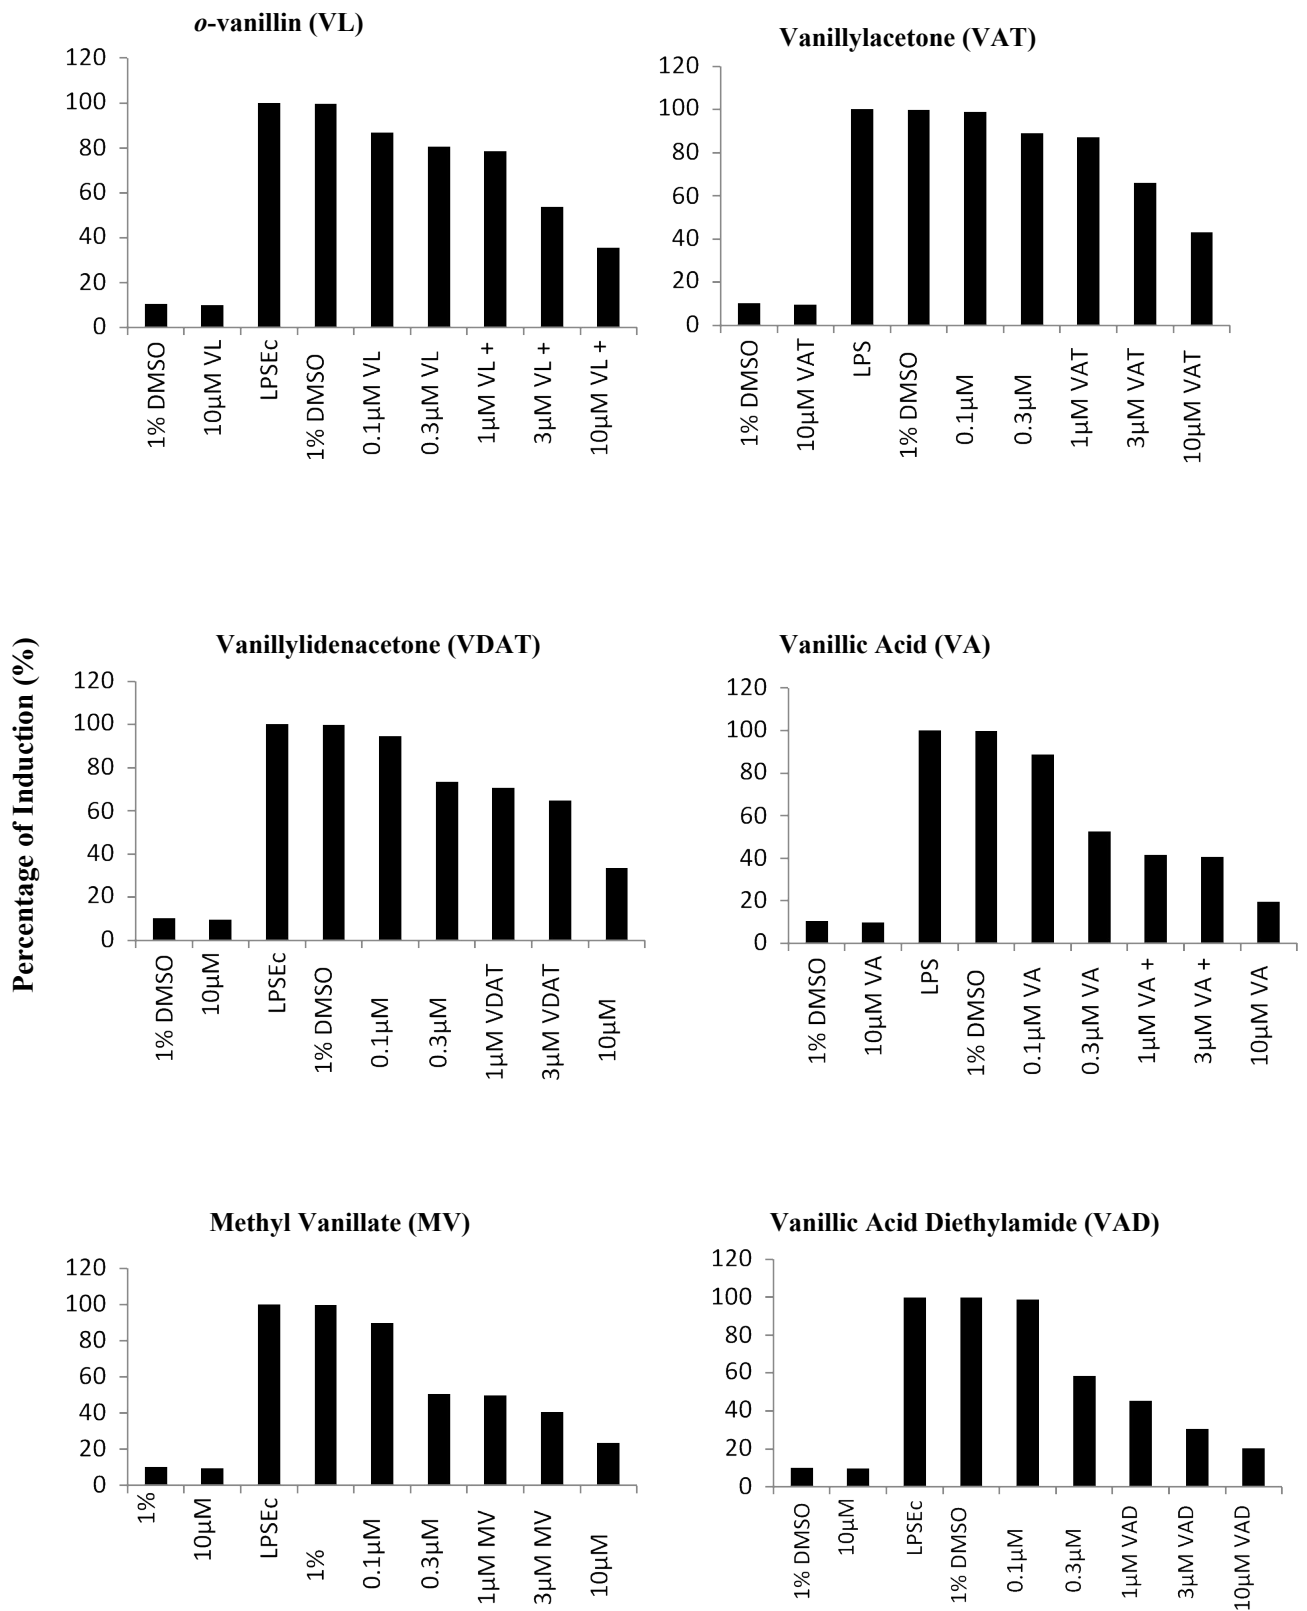

**Figure 5: Vanilloids Inhibit LPSEc Induced Nitric Oxide Production.** Resatorvid was added at respective concentrations for 1 hour and followed up by 1 μg/mL (LPSEc) for 18 hours. Results are expressed as percentage of LPSEc induced nitric oxide production  $\pm$  SD as compared to cells with only LPSEc of at least three independent experiments. Bars with the symbol (\*) are statistically significant ( $p < 0.05$ ) different by one-way ANOVA *post hoc* Dunnett's *t*-test.

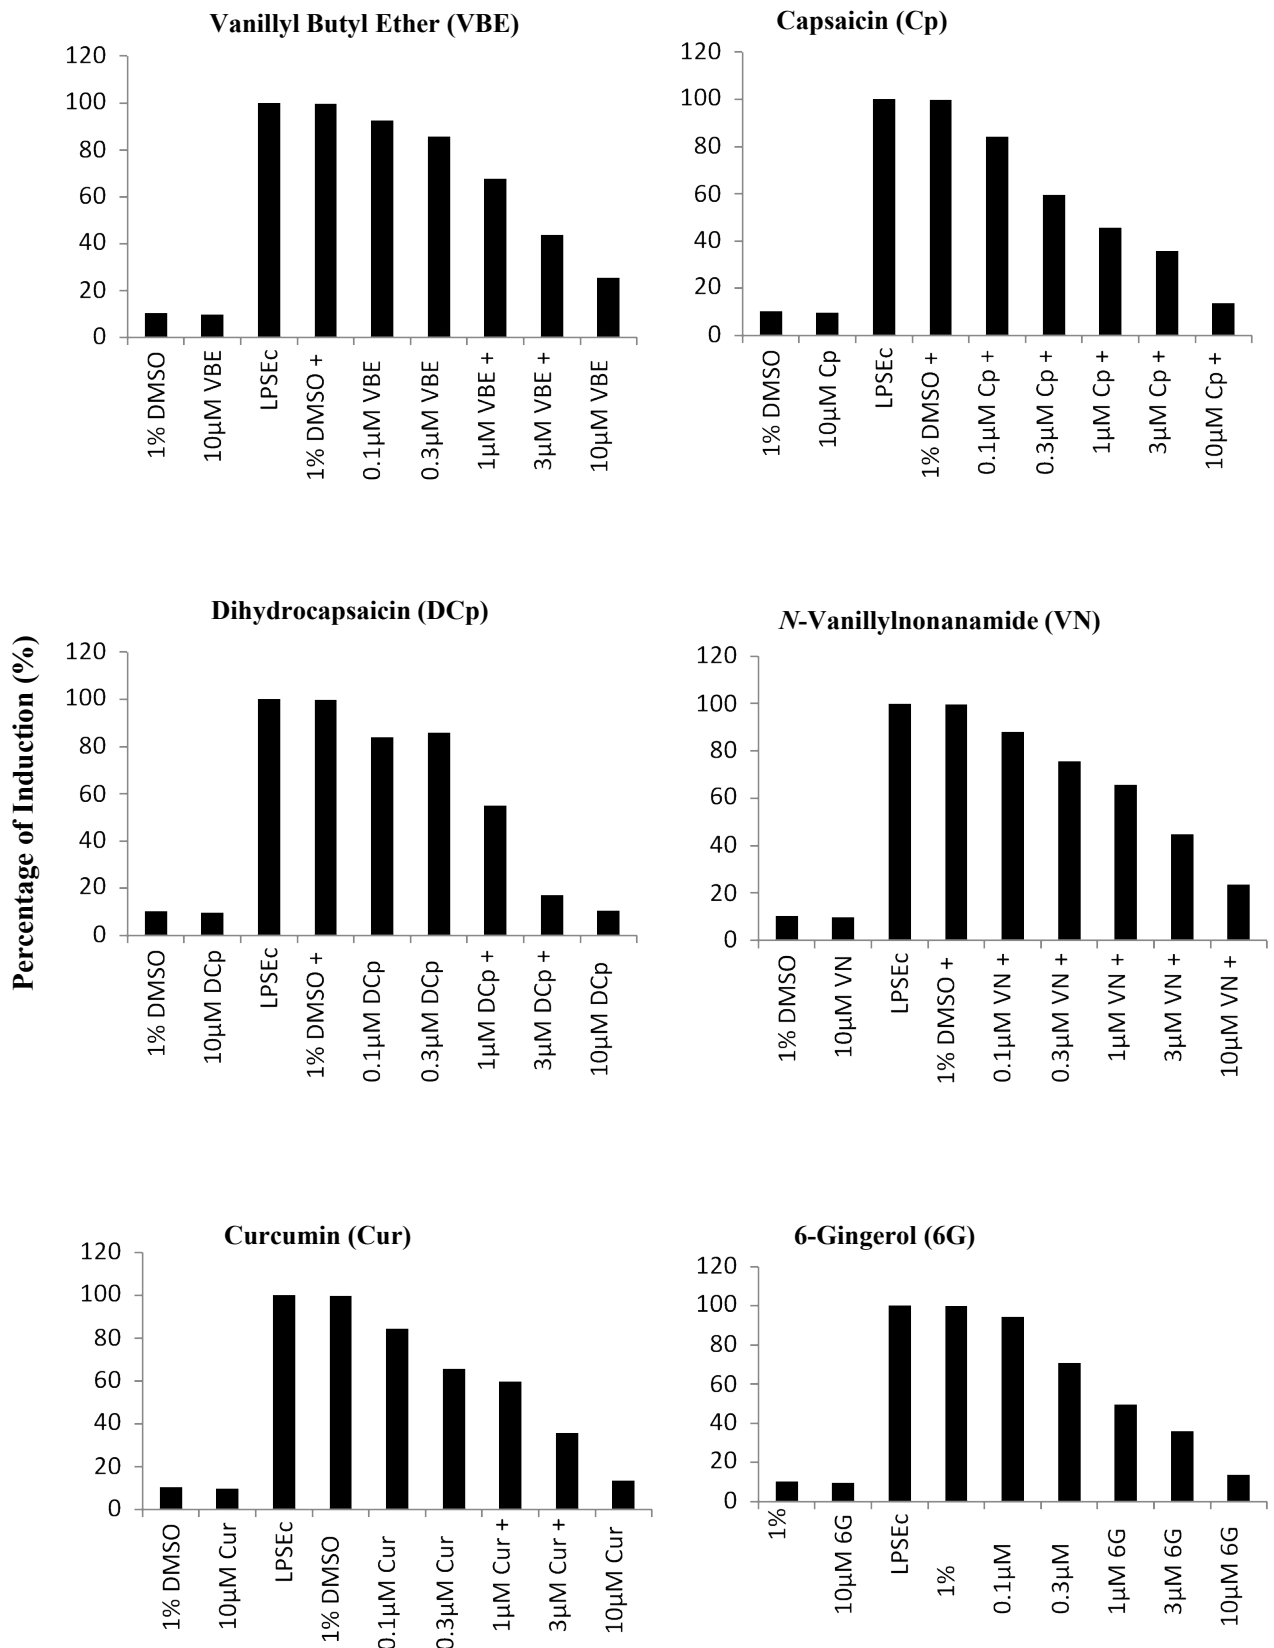

**Figure 5 (continued): Vanilloids Inhibit LPSEc Induced Nitric Oxide Production.** Resatorvid was added at respective concentrations for 1 hour and followed up by 1 μg/mL (LPSEc) for 18 hours. Results are expressed as percentage of LPSEc induced nitric oxide production  $\pm$  SD as compared to cells with only LPSEc of at least three independent experiments. Bars with the symbol (\*) are statistically significant ( $p < 0.05$ ) different by one-way ANOVA *post hoc* Dunnett's *t*-test.



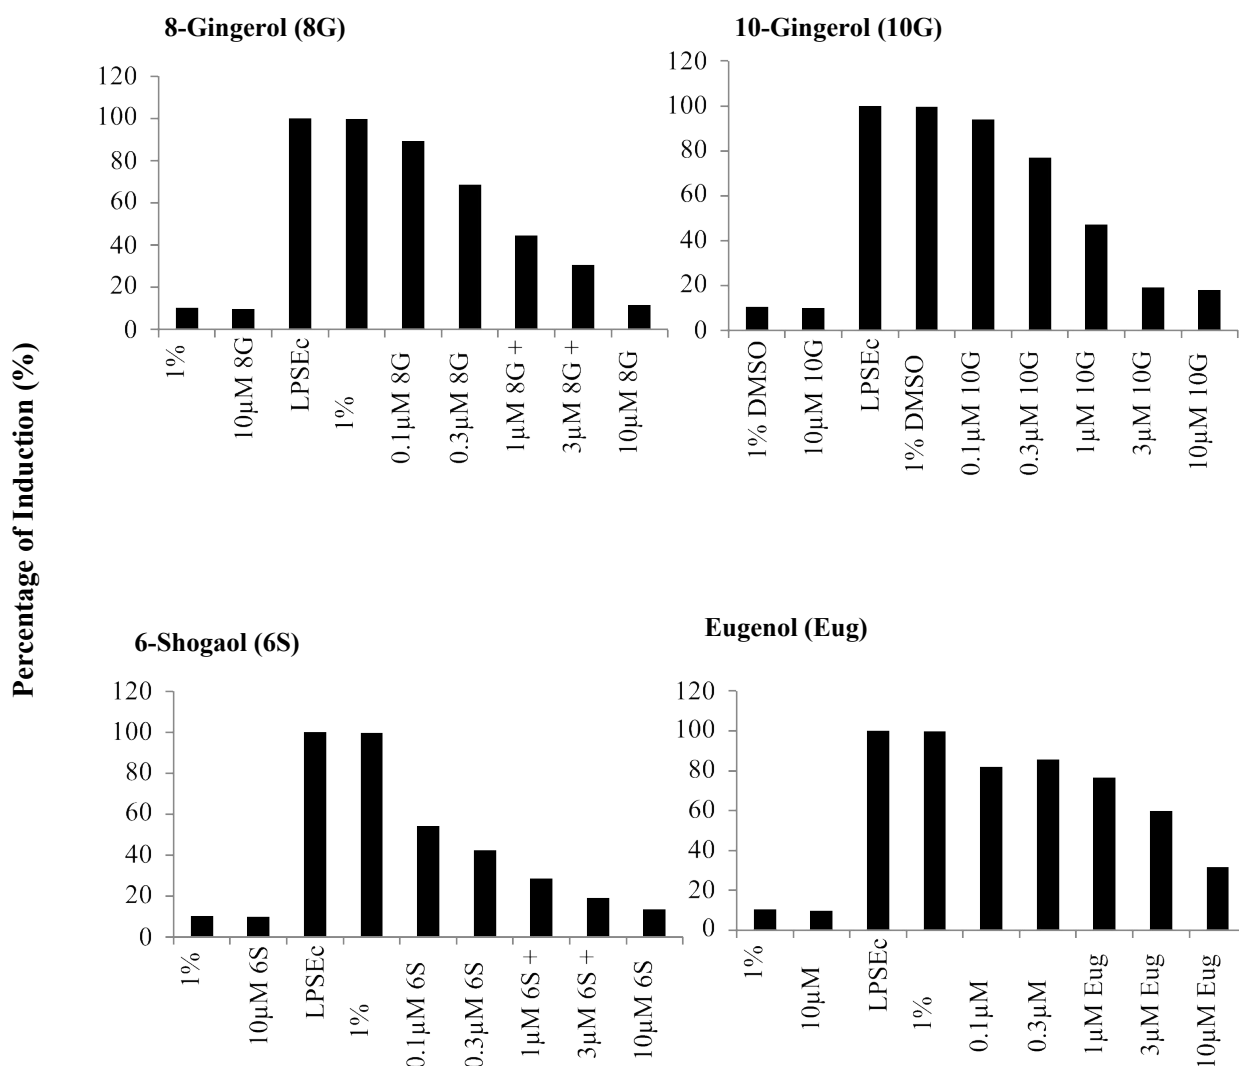

**Figure 5 (continued) : Vanilloids Inhibit LPSEc Induced Nitric Oxide Production.** Resatorvid was added at respective concentrations for 1 hour and followed up by 1 μg/mL (LPSEc) for 18 hours. Results are expressed as percentage of LPSEc induced nitric oxide production  $\pm$  SD as compared to cells with only LPSEc of at least three independent experiments. Bars with the symbol (\*) are statistically significant ( $p < 0.05$ ) different by one-way ANOVA *post hoc* Dunnett's *t*-test.

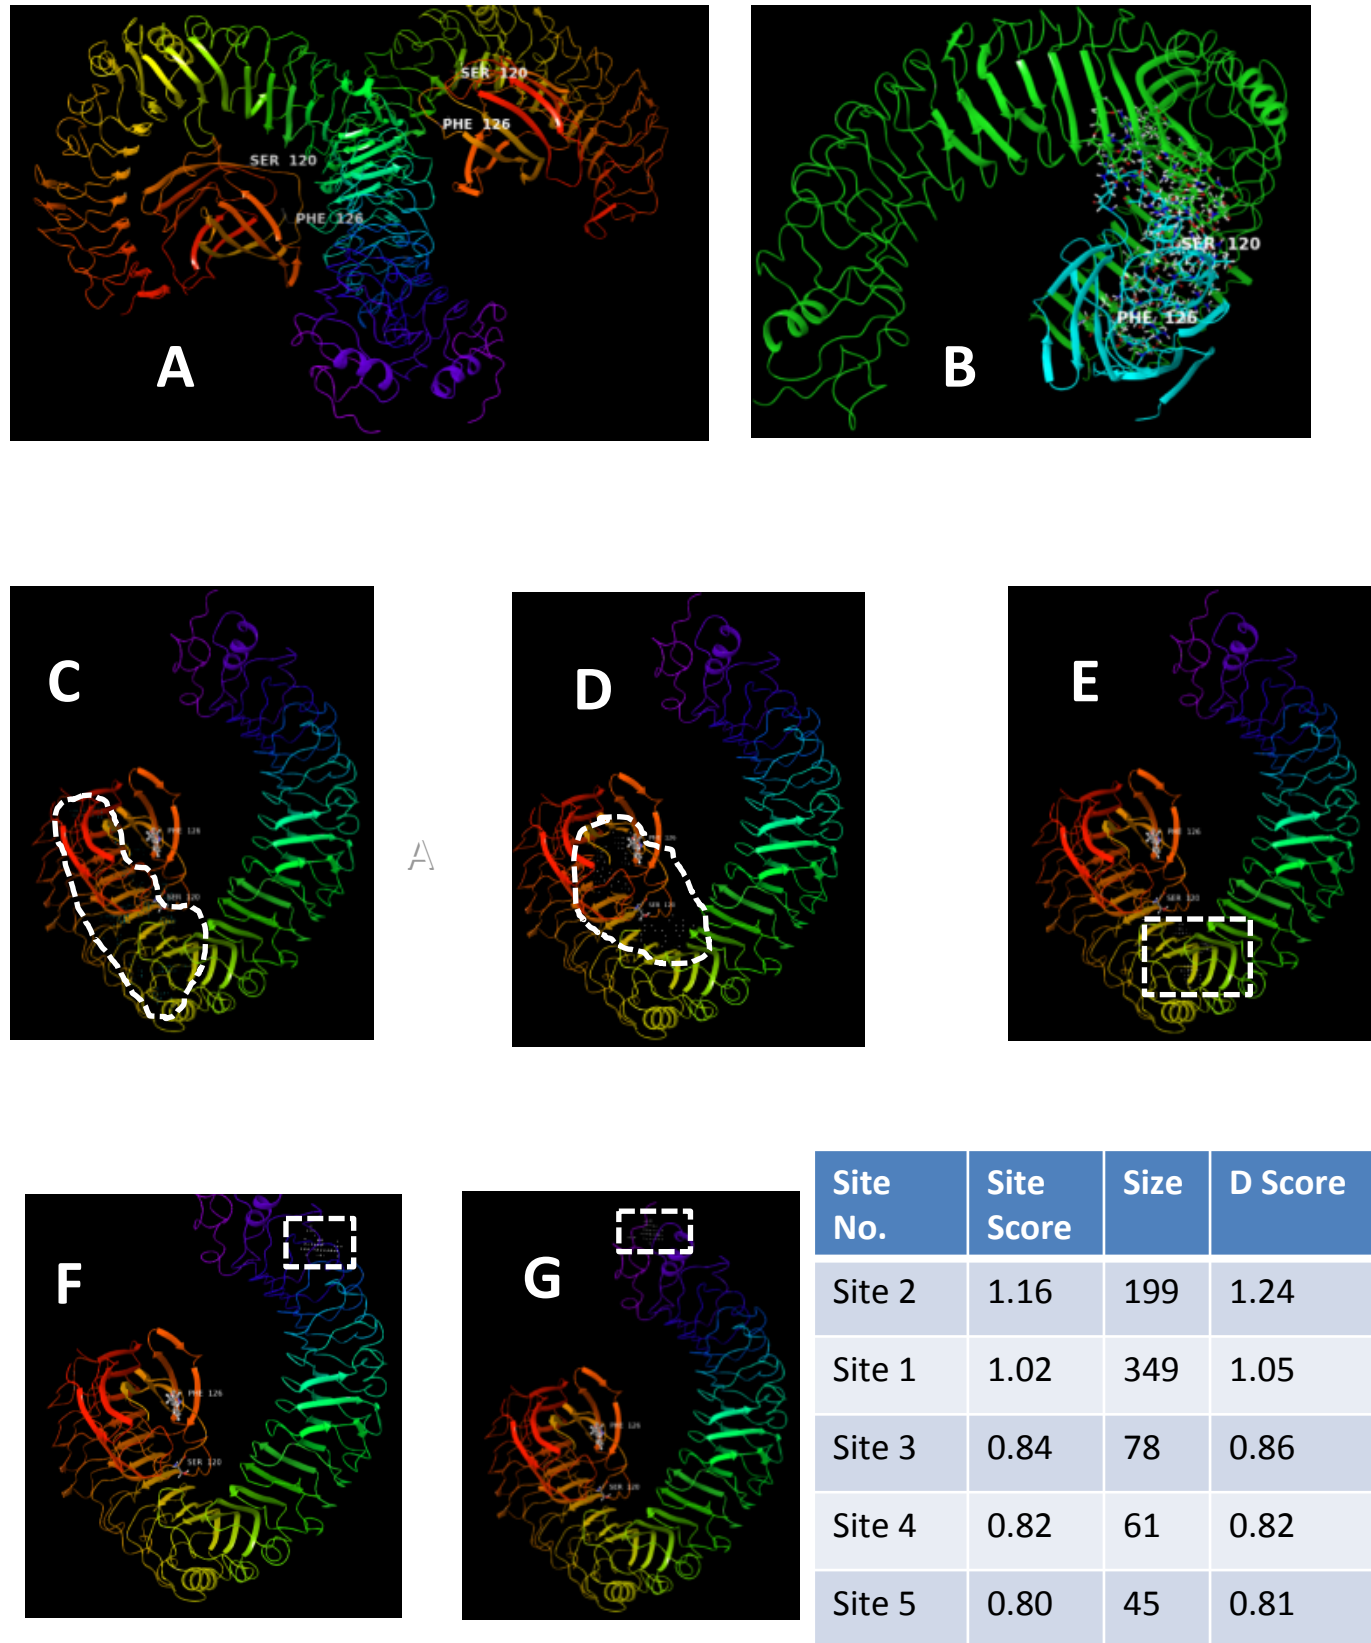

**Figure 6:** (A) TLR-4/MD-2 homodimer with key aminoacid residues (Phe 126, Ser 120); (B) Prepared TLR/MD-2 complex with key aminoacid residues at the interface; (C) Predicted binding site 1 represented in white dots; (D) Predicted binding site 2 represented in white dots; (E) Predicted binding site 3 represented in white dots; (F) Predicted binding site 4 represented in white dots; (G) Predicted binding site 5 represented in white dots.

The binding sites 1 and 2 are nearer to the key aminoacid residues (Ser 120, Phen 126). Table show the site score, size and D-scores of predicted binding sites. The binding site with high D-score (site 2) was chosen for further molecular docking studies.

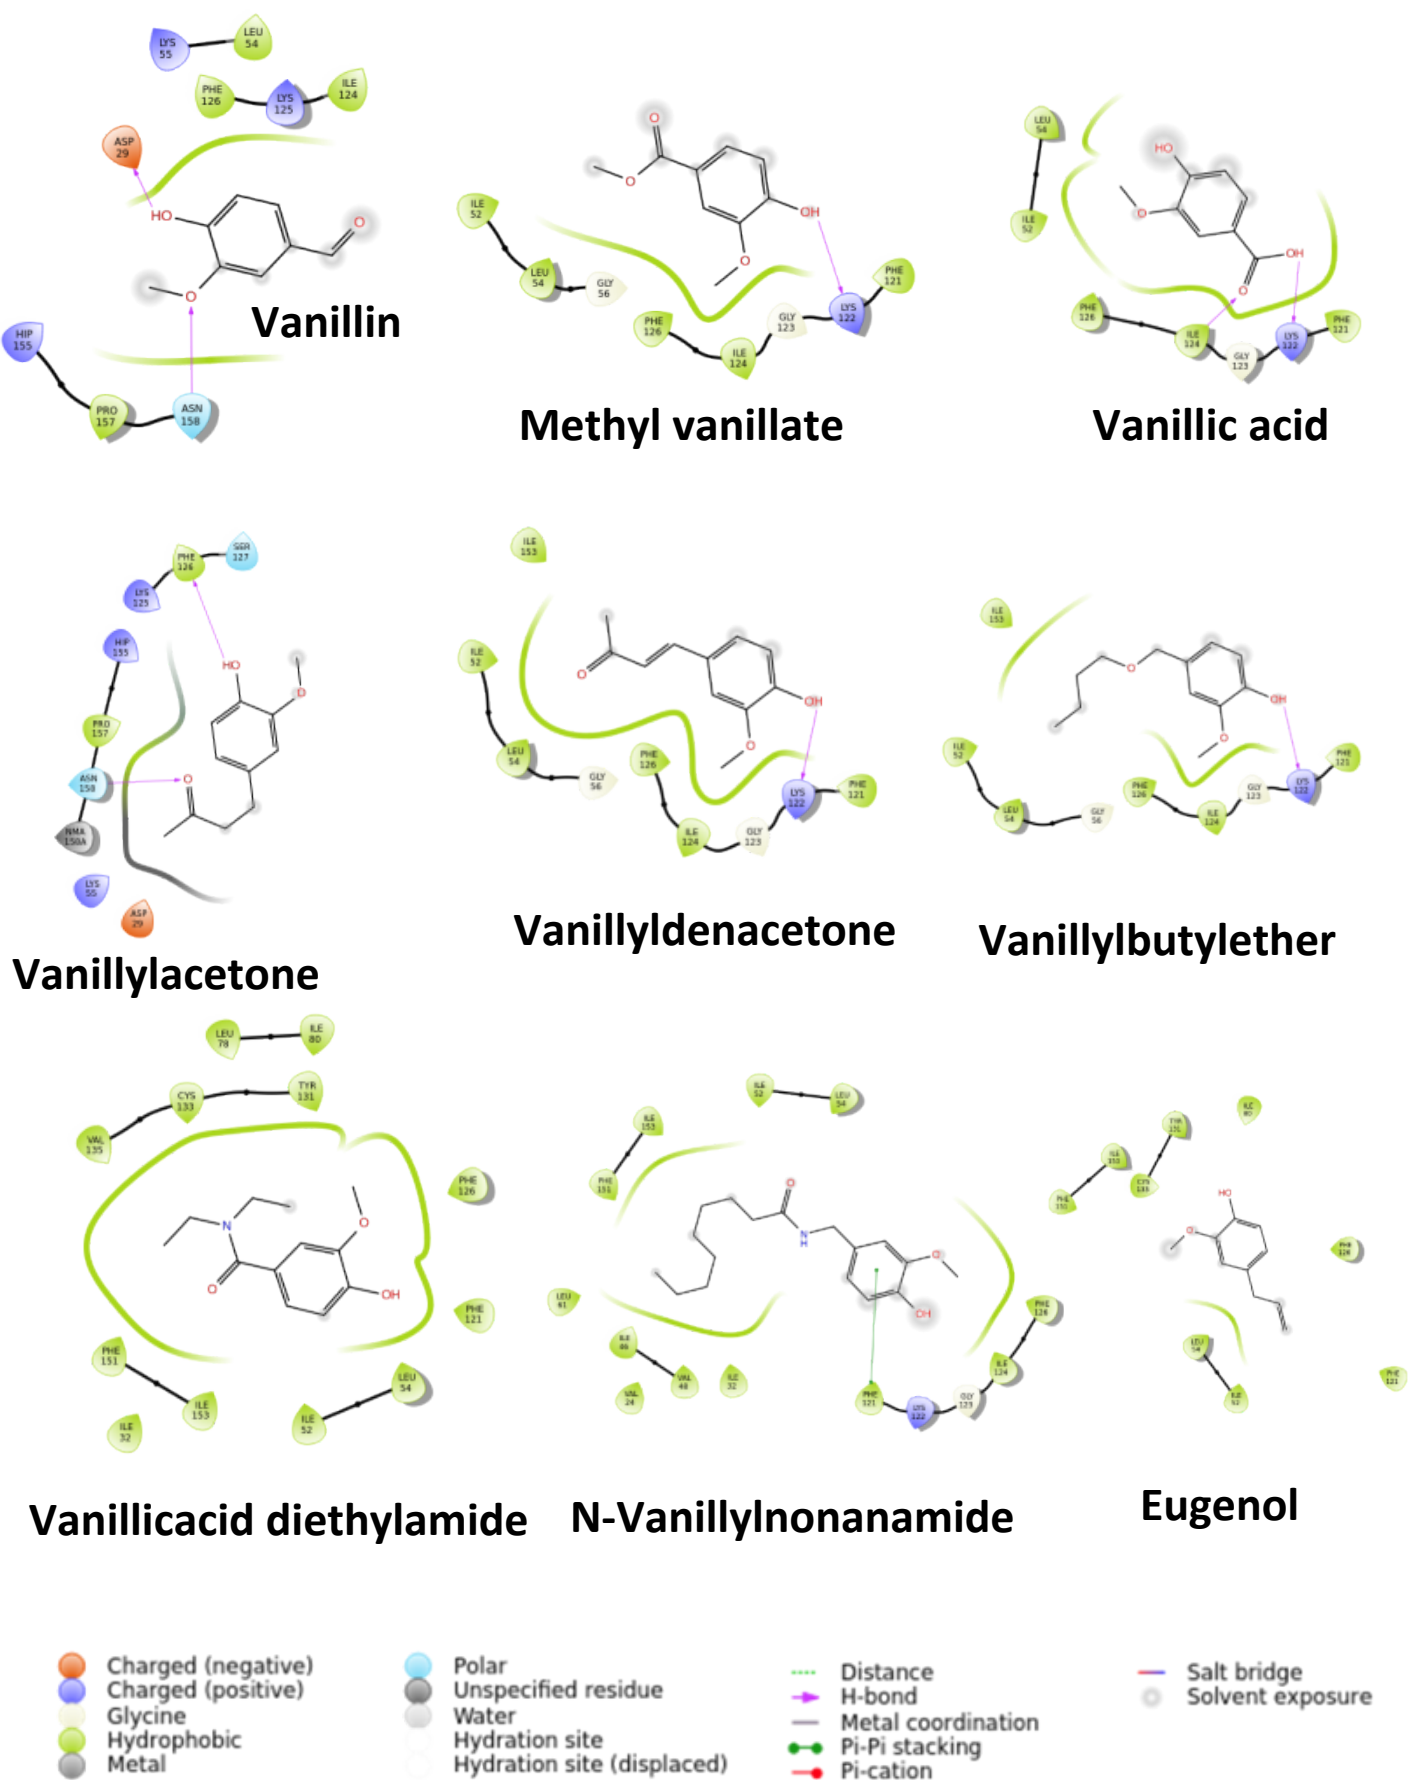

**Figure 7:** Two-dimensional diagrams of interaction between vanilloids and TLR-4/MD-2 receptor obtained from docked complexes using Glide-XP protocol.

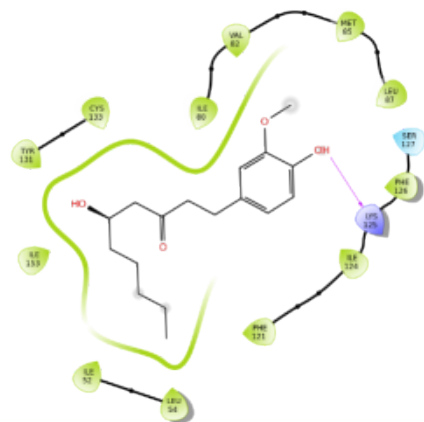

**6-Gingerol**

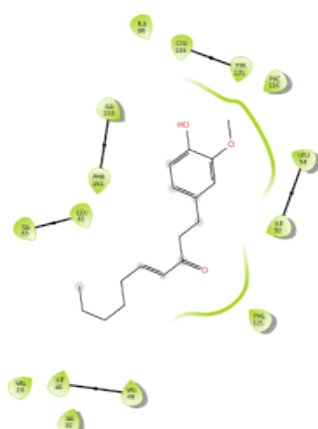

**6-Shogaol**

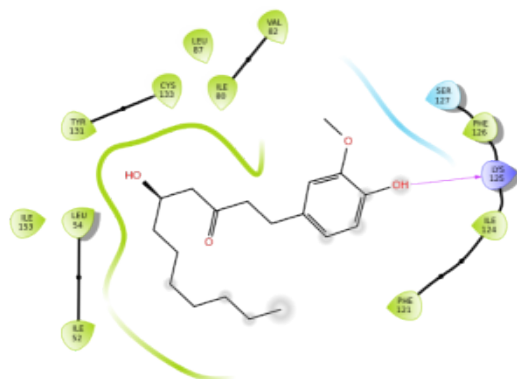

**8-Gingerol**

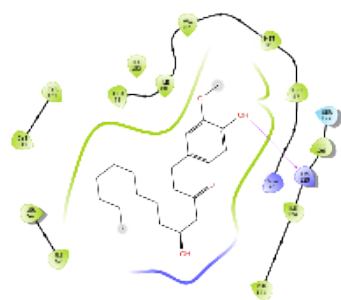

**10-Gingerol**

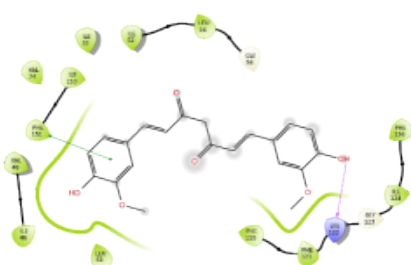

**Curcumin**

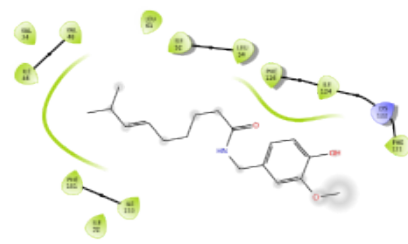

**Capsaicin**

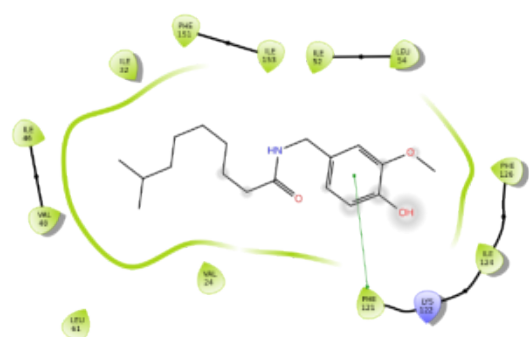

**Dihydrocapsaicin**

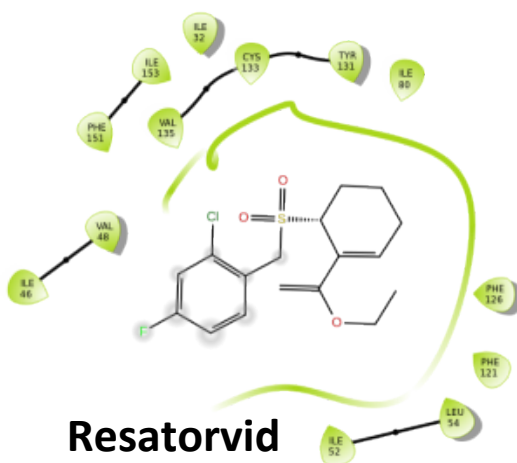

**Resatorvid**

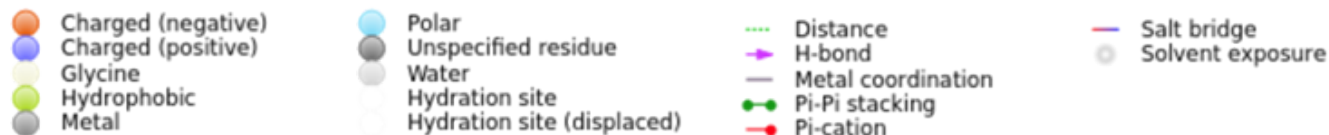

**Figure 7 (Continued) :** Two-dimensional diagrams of interaction between vanilloids and TLR-4/MD-2 receptor obtained from docked complexes using Glide-XP protocol.

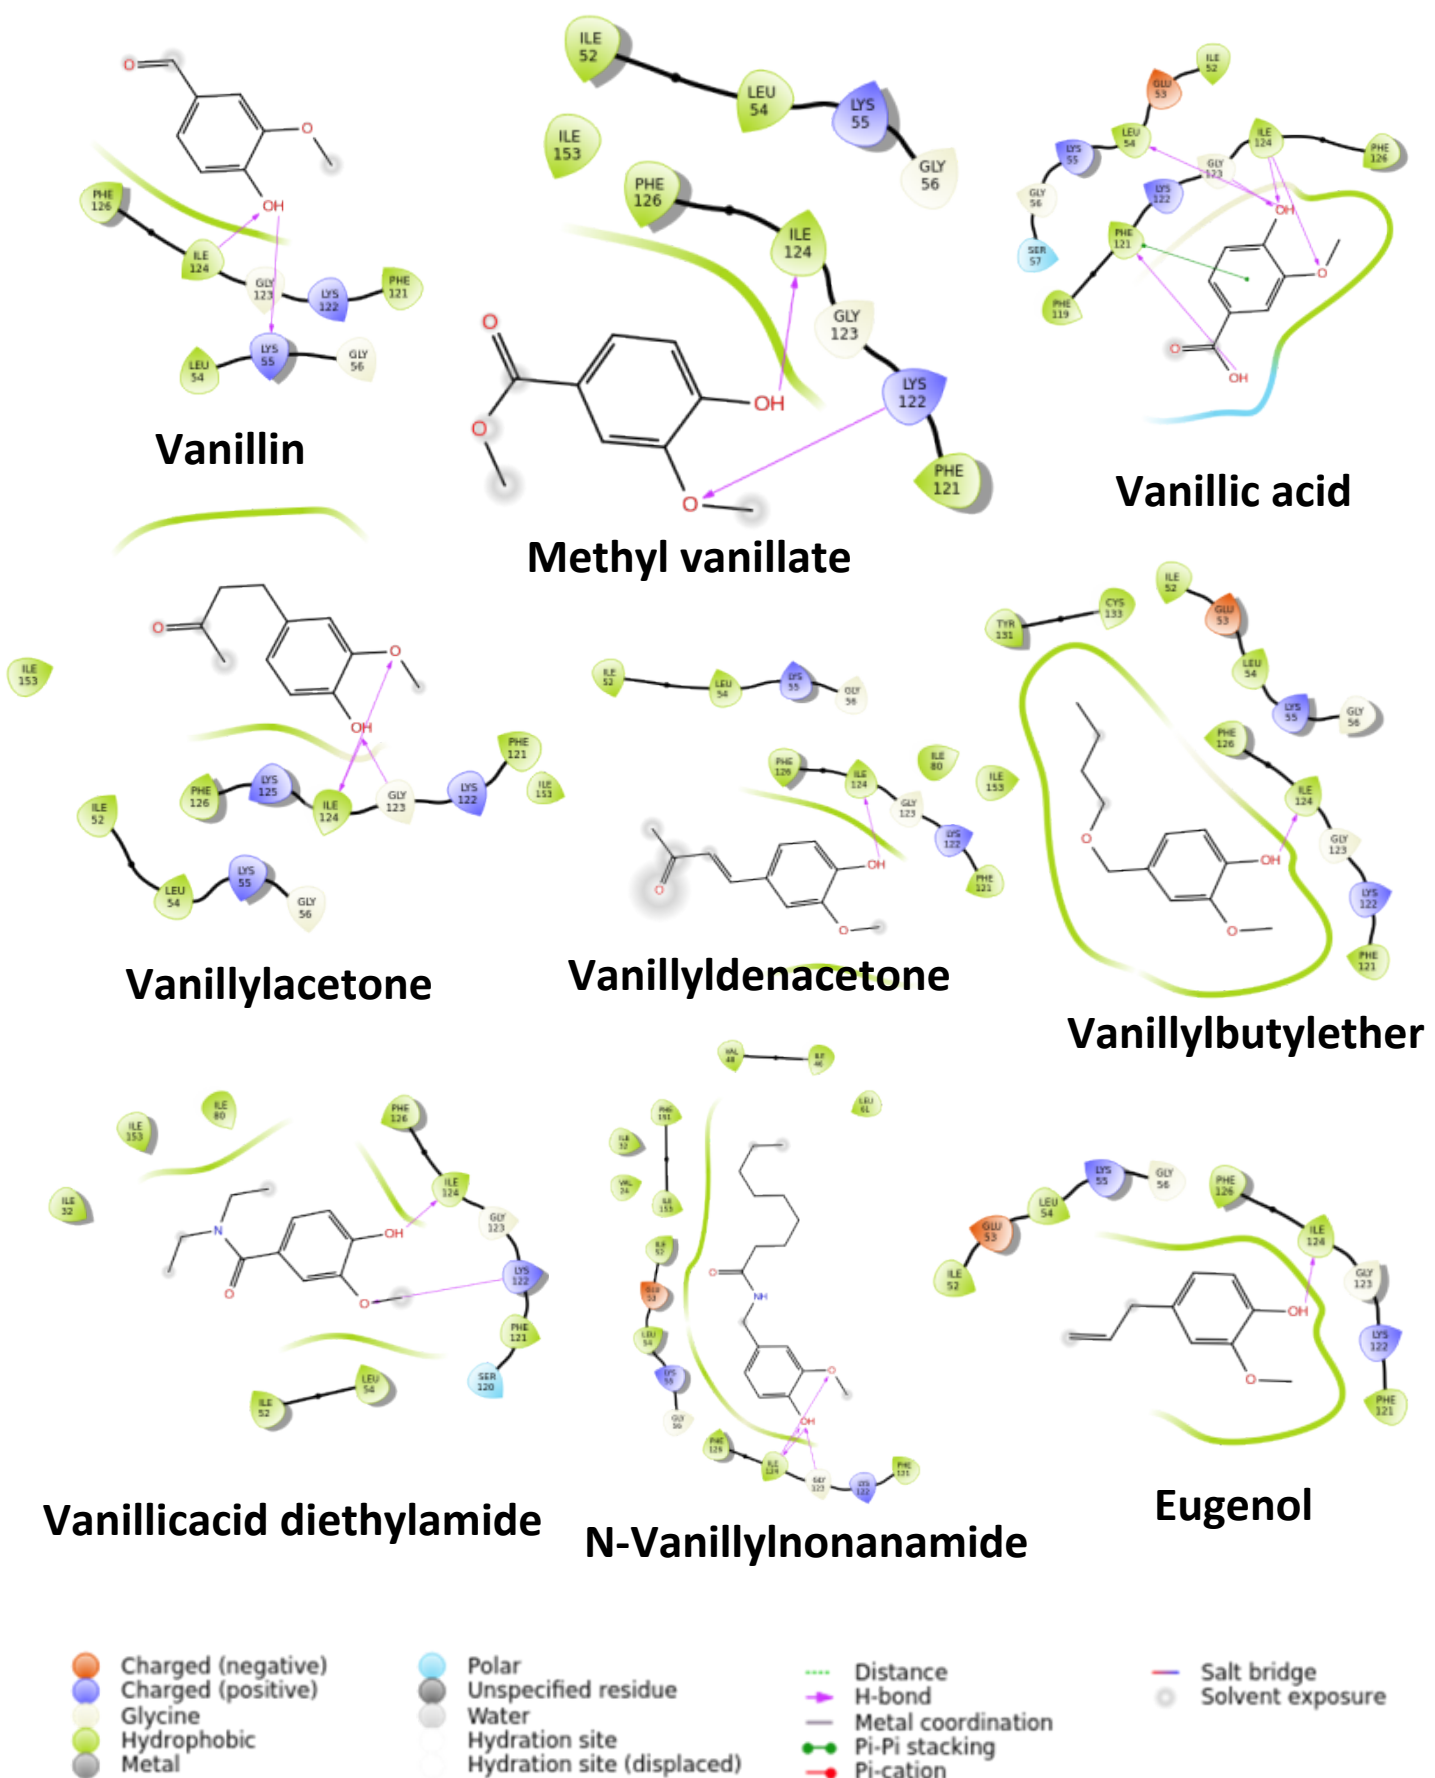

**Figure 8:**Two-dimensional diagrams of interaction between vanilloids and TLR-4/MD-2 receptor obtained from docked complexes using Induced-Fit docking protocol.

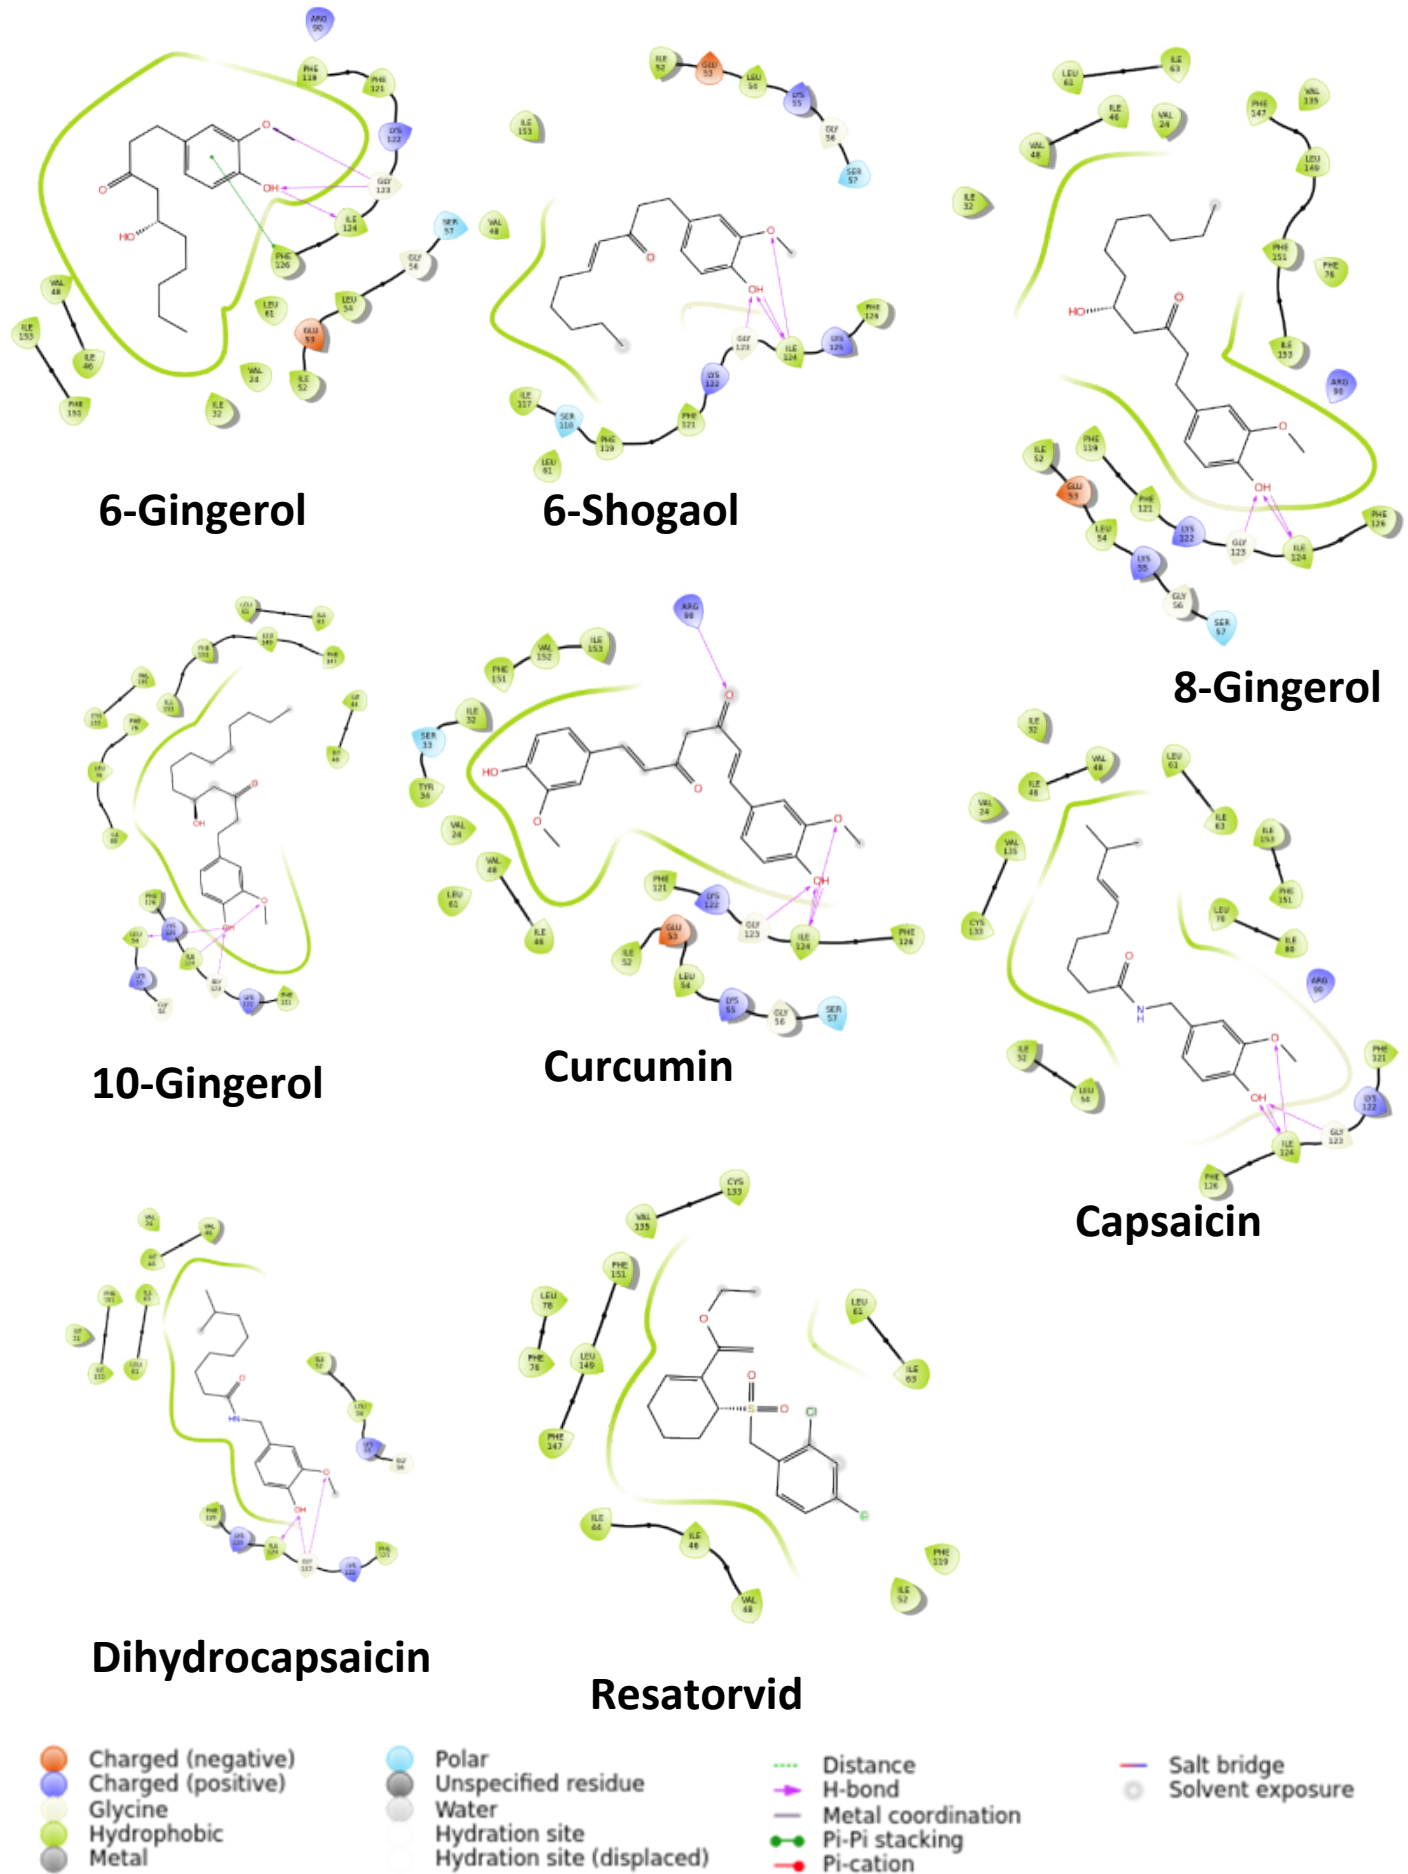

**Figure 8 (Continued) : Two-dimensional diagrams of interaction between vanilloids and TLR-4/MD-2 receptor obtained from docked complexes using Induced-Fit Docking protocol.**



Table 1: The predicted ADMET properties of vanilloids

| Compound                   | HumanOralAbsorption | PercentHumanOralAbsorption | RuleOfFive | RuleOfThree | QPlogPo/w | QPlogS | QPlogHERG | QPPCaco  | #metab | QPlogKhsa |
|----------------------------|---------------------|----------------------------|------------|-------------|-----------|--------|-----------|----------|--------|-----------|
| Vanillin                   | 3                   | 81.712                     | 0          | 0           | 0.973     | -1.145 | -3.476    | 551.652  | 2      | -0.613    |
| Vanillylacetone            | 3                   | 91.186                     | 0          | 0           | 1.772     | -2.483 | -4.172    | 1021.989 | 4      | -0.271    |
| Vanillylidenacetone        | 3                   | 89.922                     | 0          | 0           | 1.654     | -2.331 | -4.303    | 949.551  | 2      | -0.324    |
| Vanillic acid              | 3                   | 66.335                     | 0          | 0           | 1.031     | -1.437 | -1.716    | 73.024   | 2      | -0.751    |
| Methyl vanillate           | 3                   | 89.487                     | 0          | 0           | 1.755     | -2.251 | -4.065    | 832.046  | 2      | -0.391    |
| Vanillic acid diethylamide | 3                   | 95.065                     | 0          | 0           | 1.983     | -2.613 | -4.15     | 1435.838 | 2      | -0.248    |
| Vanillyl butyl ether       | 3                   | 100                        | 0          | 0           | 2.707     | -3.173 | -4.652    | 2981.275 | 4      | -0.077    |
| N-vanillylnonanamide       | 3                   | 100                        | 0          | 0           | 3.276     | -4.33  | -4.149    | 760.282  | 4      | 0.027     |
| Eugenol                    | 3                   | 100                        | 0          | 0           | 2.65      | -2.44  | -4.103    | 2983.882 | 3      | -0.113    |
| 6-Gingerol                 | 3                   | 100                        | 0          | 0           | 3.596     | -4.466 | -5.226    | 573.74   | 6      | 0.262     |
| 6-Shogaol                  | 3                   | 100                        | 0          | 0           | 3.92      | -4.837 | -5.289    | 1100.064 | 5      | 0.405     |
| 8-Gingerol                 | 3                   | 100                        | 0          | 0           | 4.417     | -5.559 | -5.745    | 555.655  | 6      | 0.529     |
| 10-Gingerol                | 1                   | 93.032                     | 1          | 1           | 5.021     | -5.81  | -5.594    | 593.936  | 6      | 0.706     |
| Curcumin                   | 2                   | 82.622                     | 0          | 0           | 2.8       | -4.592 | -6.354    | 156.535  | 5      | -0.008    |
| Capsaicin                  | 3                   | 100                        | 0          | 0           | 3.492     | -4.737 | -4.227    | 741.463  | 6      | 0.158     |
| Dihydrocapsaicin           | 3                   | 100                        | 0          | 0           | 3.613     | -4.798 | -4.232    | 814.387  | 4      | 0.163     |
| Resatorvid                 | 3                   | 100                        | 0          | 0           | 4.4       | -4.76  | -5.014    | 4921.309 | 3      | 0.234     |
